# Supplementary material
Source: MDPI journal article supplement (https://www.mdpi.com/2071-1050/11/18/4974)
Supplement: s1 [file s1]

# Sustainable diets in the UK? Developing a systematic framework to assess the environmental impact, cost and nutritional quality of household food purchases

Wendy Wrieden<sup>1</sup>, Joel Halligan<sup>1</sup>, Louis Goffe<sup>1</sup>, Karen Barton<sup>2</sup>, Ilkka Leinonen<sup>3</sup>

## Supplementary material 1

### Methods for disaggregating multi-product codes

A method that permitted greenhouse gas emissions GHGE and land use calculations to take into account both the different proportions of foods coming from different commodities, and the different constituent products making up each multi-product code was devised. However, disaggregating all of these multi-product codes and taking into account every possible constituent product, was not feasible in this study, due to the minimal contribution of some of the products to the overall food purchases. We therefore took a more pragmatic approach to this exercise and prioritised the 202 codes that accounted for 95% of all purchases (by quantity).

The first step was to explore how food and drink purchases, in terms of the proportion of overall quantity purchased across the whole dataset, were distributed across the 526 codes. The purpose of this step was to identify whether a smaller subset of the multi-product codes could be disaggregated, rather than attempting to disaggregate all multi-product codes. In doing this, we identified that 95% of all purchases (by quantity) in the 2012 and 2013 LCFS dataset were accounted for by 202 of the 526 food and drink codes. Thus, disaggregating the multi-product codes in this subset of 202 codes was prioritised.

- 1) The next step was to carry out the first part of the disaggregation of the product codes by identifying the constituent products making up each multi-product code. After identifying these constituent products using a coding frame supplied by Defra, we then used market share data

(supplied by the Food Standards Agency) to identify the main sub-products in each composite code. To do this, constituent products were added to the list of products to be disaggregated for each multi-product code until at least 50% of the market share of the multi-product code was covered. For example, for 8901 – ‘complete meat-based ready meals – frozen or not frozen’ – we identified ‘meat-based pasta dishes’ as the main product at 47% market share, followed by ‘shepherd’s pie’ at 12%.

- 2) After this, we allocated each sub-product that had been identified for disaggregation to the proportions in its respective basic commodities. Various methods were used to do this, depending on product. In the first instance, if data on commodity allocation were available from a previous study of GHGE by Scarborough (1) these were used. If these were not available, we used ‘www.tesco.com’ to view the ingredient list and nutritional information panel in order to estimate the main commodities. If the data could not be obtained in this way then a recipe was used, from ‘bbcgoodfood.com’. For example, for ‘meat-based pasta dishes’, the recipe for lasagne was used from the work of Scarborough(1) and for ‘shepherd’s pie’ a recipe was used from ‘bbcgoodfood.com’.
- 3) Once each sub-product within each multi-product code had been disaggregated into its respective commodities, we calculated a weighted aggregate commodity allocation based on the market share of each product that was used for disaggregation. For example, the code 8901 – ‘complete meat-based ready meals – frozen or not frozen’ – was weighted to 79.7% for ‘meat-based pasta dishes’ and 20.3% for ‘shepherd’s pie’.

Single-product codes did not need disaggregation and thus were allocated to a single commodity. After disaggregating the multi-product codes in the subset of 202 codes that accounted for 95% of purchases, it was necessary to devise a method by which to allocate the remaining 324 codes that were not part of the disaggregation exercise. To do this, the closest match amongst those products that had been already disaggregated was used. A small number of products that did not have a suitable match were allocated to a single component, i.e. ‘fudges, toffees and caramels’ were allocated to ‘sugar’.

1. Scarborough P, Appleby PN, Mizdrak A, Briggs AD, Travis RC, Bradbury KE, et al. Dietary greenhouse gas emissions of meat-eaters, fish-eaters, vegetarians and vegans in the UK. *Climatic change*. 2014;125(2):179-92.

## Supplementary material 2

Calculation to exclude those households that purchased a lower than feasible amount of food to maintain the Basal Metabolic Rate of the members of the household.

The LCFS details the household composition by the following categories:

- Male children < 2
- Male children 2 to < 5
- Male children 5 to < 16
- Male children 16 to < 18
- Male adults < 45
- Male adults 45 to < 60
- Male adults 60 to < 65
- Male adults 65 to < 70
- Male adults 70 and over
- Female children < 2
- Female children 2 to < 5
- Female children 5 to < 16
- Female children 16 to < 18
- Female adults < 45
- Female adults 45 to < 60

- Female adults 60 to < 65
- Female adults 65 to < 70
- Female adults 70 and over

There are a range of BMR calculations, we used the estimates derived by Henry (2005)<sup>1</sup>, that used both weight and height measures.

Henry (2005)<sup>1</sup> weight and height prediction equation:

$$BMR = \text{weight coefficient} * \text{weight (kg)} + \text{height coefficient} * \text{height (m)} + \text{constant}$$

In order to generate estimates we required height and reference values for each gender/age category. For this we used a combination of: WHO growth standards<sup>2</sup>; UK 1990 reference for children and adolescents<sup>3</sup>; and Health Survey for England 2009<sup>4</sup>. The following table contains the full details. Those households where food purchases per person suggested a lower than feasible energy intake to maintain BMR were excluded.

## Table

| Group                      | Height & weight reference                                                  | Weight (kg) | Height (m) | BMR reference   | Weight coefficient | Height coefficient | Constant | BMR (kcal/day) | BMR (kcal/14 days) |
|----------------------------|----------------------------------------------------------------------------|-------------|------------|-----------------|--------------------|--------------------|----------|----------------|--------------------|
| Male children < 2          | WHO growth standards: male age 1 <sup>2</sup>                              | 9.6         | 0.76       | Male: < 3       | 28.2               | 859                | -371     | 552.56         | 7735.84            |
| Male children 2 to < 5     | WHO growth standards: male age 2 <sup>2</sup>                              | 12.2        | 0.87       | Male: < 3       | 28.2               | 859                | -371     | 720.37         | 10085.18           |
| Male children 5 to < 16    | UK 1990 reference for children and adolescents: male age 5 <sup>3</sup>    | 18.6        | 1.1        | Male: 3 - 10    | 15.1               | 313                | 306      | 931.16         | 13036.24           |
| Male children 16 to < 18   | UK 1990 reference for children and adolescents: male age 13 <sup>2</sup>   | 60.2        | 1.73       | Male: 10 - 18   | 15.6               | 266                | 299      | 1698.3         | 23776.2            |
| Male adults < 45           | Health Survey for England 2009: male age 35-44 <sup>4</sup>                | 69.7        | 1.76       | Male: 30 - 60   | 11.4               | 541                | -137     | 1609.74        | 22536.36           |
| Male adults 45 to < 60     | Health Survey for England 2009: male age 45-54 <sup>4</sup>                | 68.8        | 1.75       | Male: 30 - 60   | 11.4               | 541                | -137     | 1594.07        | 22316.98           |
| Male adults 60 to < 65     | Health Survey for England 2009: male age 55-64 <sup>3</sup>                | 68.3        | 1.74       | Male: > 60      | 11.4               | 541                | -256     | 1463.96        | 20495.44           |
| Male adults 65 to < 70     | Health Survey for England 2009: male age 65-74 <sup>4</sup>                | 67          | 1.73       | Male: > 60      | 11.4               | 541                | -256     | 1443.73        | 20212.22           |
| Male adults 70 and over    | Health Survey for England 2009: male age 75+ <sup>4</sup>                  | 65.1        | 1.7        | Male: > 60      | 11.4               | 541                | -256     | 1405.84        | 19681.76           |
| Female children < 2        | WHO growth standards: female age 1 <sup>2</sup>                            | 9           | 0.74       | Female: < 3     | 30.4               | 703                | -287     | 506.82         | 7095.48            |
| Female children 2 to < 5   | WHO growth standards: female age 2 <sup>2</sup>                            | 11.5        | 0.86       | Female: < 3     | 30.4               | 703                | -287     | 667.18         | 9340.52            |
| Female children 5 to < 16  | UK 1990 reference for children and adolescents: female age 5 <sup>3</sup>  | 18.2        | 1.09       | Female: 3 - 10  | 15.9               | 210                | 349      | 867.28         | 12141.92           |
| Female children 16 to < 18 | UK 1990 reference for children and adolescents: female age 16 <sup>3</sup> | 55.3        | 1.63       | Female: 10 - 18 | 9.4                | 249                | 462      | 1387.69        | 19427.66           |
| Female adults < 45         | Health Survey for England 2009: female age 35-44 <sup>4</sup>              | 59.9        | 1.63       | Female: 30 - 60 | 8.18               | 502                | -11.6    | 1296.642       | 18152.988          |
| Female adults 45 to < 60   | Health Survey for England 2009: female age 45-54 <sup>4</sup>              | 59          | 1.62       | Female: 30 - 60 | 8.18               | 502                | -11.6    | 1284.26        | 17979.64           |
| Female adults 60 to < 65   | Health Survey for England 2009: female age 55-64 <sup>4</sup>              | 58          | 1.61       | Female: > 60    | 8.52               | 421                | 10.7     | 1182.67        | 16557.38           |
| Female adults 65 to < 70   | Health Survey for England 2009: female age 65-74 <sup>4</sup>              | 57.2        | 1.59       | Female: > 60    | 8.52               | 421                | 10.7     | 1167.434       | 16344.076          |

|                           |                                                                |      |      |              |      |     |      |          |           |
|---------------------------|----------------------------------------------------------------|------|------|--------------|------|-----|------|----------|-----------|
| Female adults 70 and over | Health Survey for England 2009:<br>female age 75+ <sup>4</sup> | 54.3 | 1.55 | Female: > 60 | 8.52 | 421 | 10.7 | 1125.886 | 15762.404 |
|---------------------------|----------------------------------------------------------------|------|------|--------------|------|-----|------|----------|-----------|

<sup>1</sup> Henry CJ. Basal metabolic rate studies in humans: measurement and development of new equations, 2005, *Public Health Nutr* 8, 1133-1152.

<sup>2</sup> World Health Organization (2006) WHO Child Growth Standards: Methods and development: Length/height-for-age, weight-for-age, weight-for-length, weight-for-height and body mass index-for-age. Geneva, Switzerland: World Health Organization

<sup>3</sup> Freeman. JV et al. Cross sectional stature and weight reference curves for the UK, 1990. *Arch Dis Child* 1995;73:1724

<sup>4</sup> National Health Service (NHS) Information Centre (2010) Health Survey for England - 2009 trend tables. The NHS Information Centre for health and social care.

TABLE S1: COMPONENTS OF THE DIET QUALITY INDEX AND SCORING SYSTEM

| FOODS                                                                                                                                                                                                                                               | SCORING                                                                                  | RATIONALE                                                                                                                    |
|-----------------------------------------------------------------------------------------------------------------------------------------------------------------------------------------------------------------------------------------------------|------------------------------------------------------------------------------------------|------------------------------------------------------------------------------------------------------------------------------|
| <b>Fruit and Vegetables</b>                                                                                                                                                                                                                         |                                                                                          |                                                                                                                              |
| A sliding score from 0 to 10 was used to score intake. Fruit/ vegetable juice was adjusted by a 150ml = 80g factor.<br>As mean intakes of fruit/vegetable juice and baked beans were less than one portion per day, no further adjustment was made. | Weight divided by 400g x 10                                                              | ≥400g / day WHO/FAO expert consultation on diet, nutrition and prevention of chronic diseases. <sup>1</sup>                  |
| Minimum Score = 0; Maximum Score = 10                                                                                                                                                                                                               |                                                                                          |                                                                                                                              |
| <b>Fish</b>                                                                                                                                                                                                                                         |                                                                                          |                                                                                                                              |
| <b>Addition of scores from Oily and White Fish</b>                                                                                                                                                                                                  | Sliding scale from 0 to 10, with any scores between 10 and 15 (see below) adjusted to 10 | Eat at least two 140g portions of cooked fish per week, of which one should be oily <sup>2</sup>                             |
| Minimum Score = 0; Maximum Score = 10                                                                                                                                                                                                               |                                                                                          |                                                                                                                              |
| <b>Oily Fish</b>                                                                                                                                                                                                                                    | Weight divided by 280g x 10                                                              |                                                                                                                              |
| A sliding score from 0 to 10 was used to score intake                                                                                                                                                                                               | Minimum Score = 0; Maximum Score = 10                                                    |                                                                                                                              |
| <b>White Fish</b>                                                                                                                                                                                                                                   |                                                                                          |                                                                                                                              |
| A sliding score from 0 to 5 was used to score intake                                                                                                                                                                                                | Weight divided by 140g x 5                                                               |                                                                                                                              |
| Minimum Score = 0; Maximum Score = 5                                                                                                                                                                                                                |                                                                                          |                                                                                                                              |
| <b>Meat and Meat Products</b>                                                                                                                                                                                                                       |                                                                                          |                                                                                                                              |
| <b>Addition of Scores from Red Meat and Processed Meat</b>                                                                                                                                                                                          | Score out of 10                                                                          | People who eat red meat to consume less than 500g (cooked red meat) a week, very little if any to be processed. <sup>3</sup> |
| <b>Total Red and Processed Meat</b>                                                                                                                                                                                                                 | ≤71.4g / day = 5                                                                         |                                                                                                                              |
| A score of 0 or 5 was used to score intake                                                                                                                                                                                                          | >71.4g / day = 0                                                                         |                                                                                                                              |
| <b>Processed Meat</b>                                                                                                                                                                                                                               | 0g / day = 5                                                                             |                                                                                                                              |
| A score of 0 or 5 was used to score intake                                                                                                                                                                                                          | >0g / day = 0                                                                            |                                                                                                                              |
| Minimum Score = 0; Maximum Score = 10                                                                                                                                                                                                               |                                                                                          |                                                                                                                              |

| NUTRIENTS                                             | SCORING                                       | RATIONALE                                                                      |
|-------------------------------------------------------|-----------------------------------------------|--------------------------------------------------------------------------------|
| <b>Fat</b>                                            |                                               |                                                                                |
| A score of 0 or 10 was used to score intake           | ≤35% food energy = 10<br>>35% food energy = 0 | Scottish Dietary Goal 2013 <sup>4</sup> and DRV ≤35% food energy. <sup>5</sup> |
| <b>Saturated Fat</b>                                  |                                               |                                                                                |
| A score of 0 or 10 was used to score intake           | ≤11% food energy = 10 >11% food energy = 0    | Scottish Dietary Goal 2013 <sup>4</sup> and DRV ≤11% food energy. <sup>5</sup> |
| <b>Intrinsic and Milk Sugars and Starch</b>           |                                               |                                                                                |
| A score of 0 or 10 was used to score intake           | ≥39% food energy = 10 <39% food energy = 0    | DRV ≥39% food energy. <sup>5</sup>                                             |
| <b>NME Sugars</b>                                     |                                               |                                                                                |
| A score of 0 or 10 was used to score intake           | ≤11% food energy = 10 >11% food energy = 0    | DRV ≤11% food energy. <sup>5</sup>                                             |
| <b>NSP</b>                                            |                                               |                                                                                |
| A sliding score from 0 to 10 was used to score intake | Weight divided by 18g x 10                    | DRV 18g per day. <sup>5</sup>                                                  |
| Minimum Score = 0; Maximum Score = 10                 |                                               |                                                                                |
| <b>Alcohol</b>                                        |                                               |                                                                                |
| A score of 0 or 5 was used to score intake            | ≤5% total energy = 5 >5% total energy = 0     | ≤5% energy. <sup>5</sup>                                                       |

<sup>1</sup> **World Health Organisation** (2003). *Diet, nutrition and the prevention of chronic diseases. Joint WHO/FAO Expert Consultation*. WHO Technical Report Series no. 916. Geneva, WHO.

<sup>2</sup> **Scientific Advisory Committee on Nutrition (SACN)**. (2004). *Advice on fish consumption: benefits & risks*. Retrieved 19 March 2014, from [http://www.sacn.gov.uk/pdfs/fics\\_sacn\\_advice\\_fish.pdf](http://www.sacn.gov.uk/pdfs/fics_sacn_advice_fish.pdf).

<sup>3</sup> **World Cancer Research Fund / American Institute for Cancer Research** (2007). *Food, nutrition, physical activity and the prevention of cancer: a global perspective*. Washington, D.C., American Institute for Cancer Research.



<sup>4</sup> **Scottish Government.** (2013). *Revised Dietary Goals for Scotland*. Retrieved 5 December 2013, from <http://www.scotland.gov.uk/Topics/Health/Healthy-Living/Food-Health/DietaryGoalsScot>

<sup>5</sup> **Department of Health** (1991). *Dietary Reference Values for Food Energy and Nutrients for the United Kingdom. Report of the Panel on Dietary Reference Values of the Committee on Medical Aspects of Food Policy (COMA) Department of Health Report on Health and Social Subjects 41*. London, HMSO

## Table S2 Coding Frame for Diet Quality Index

The following coding frame is for each of the 3 food components of the DQI score. The factor is used to multiply the daily intake in order to compare with dietary guidelines.

### 1. Fruit and Vegetables including fruit (and vegetable) juice and baked beans

| Defra Code | Description                                                                      | Factor |
|------------|----------------------------------------------------------------------------------|--------|
| 16201      | Cabbages, fresh                                                                  | 1      |
| 16301      | Brussels sprouts, fresh                                                          | 1      |
| 16401      | Cauliflower, fresh                                                               | 1      |
| 16701      | Lettuce & leafy salads                                                           | 1      |
| 16702      | Prepared lettuce salads                                                          | 1      |
| 16801      | Peas, fresh                                                                      | 1      |
| 16901      | Beans, fresh                                                                     | 1      |
| 17101      | Other fresh green vegetables                                                     | 1      |
| 17201      | Carrots, fresh                                                                   | 1      |
| 17301      | Turnips & swede, fresh                                                           | 1      |
| 17401      | Other root vegetable, fresh                                                      | 1      |
| 17501      | Onions, leeks, shallots, fresh                                                   | 1      |
| 17601      | Cucumbers, fresh                                                                 | 1      |
| 17701      | Mushrooms, fresh                                                                 | 1      |
| 17801      | Tomatoes, fresh                                                                  | 1      |
| 18301      | Stewpack, stirfry pack, pack of mixed vegetables                                 | 1      |
| 18302      | Stem vegetables                                                                  | 1      |
| 18303      | Marrow, courgettes, aubergine, pumpkin and other fresh vegetables                | 1      |
| 18304      | Fresh herbs                                                                      | 1      |
| 18401      | Tomatoes, canned or bottled                                                      | 1      |
| 18501      | Peas, canned                                                                     | 1      |
| 18802      | Baked beans in sauce                                                             | 1      |
| 18803      | Other canned beans & pulses                                                      | 1      |
| 19101      | Other canned vegetables                                                          | 1      |
| 19201      | Dried pulses other than air-dried                                                | 6.19   |
| 19501      | Air-dried vegetables                                                             | 14.39  |
| 19602      | Tomato puree and vegetable purees                                                | 5.2    |
| 19603      | Vegetable juices e.g. tomato juice, carrot juice                                 | 0.533  |
| 20301      | Peas, frozen                                                                     | 1      |
| 20401      | Beans, frozen                                                                    | 1      |
| 20601      | Ready meals & other vegetable products - frozen or not frozen                    | 0.4    |
| 20604      | All vegetable takeaway products                                                  | 0.4    |
| 20801      | Other frozen vegetables                                                          | 1      |
| 21001      | Fresh oranges                                                                    | 1      |
| 21401      | Other fresh citrus fruits                                                        | 1      |
| 21701      | Fresh apples                                                                     | 1      |
| 21801      | Fresh pears                                                                      | 1      |
| 22101      | Fresh stone fruit                                                                | 1      |
| 22201      | Fresh grapes                                                                     | 1      |
| 22701      | Other fresh soft fruit                                                           | 1      |
| 22801      | Fresh bananas                                                                    | 1      |
| 22901      | Fresh melon                                                                      | 1      |
| 23101      | Other fresh fruit                                                                | 1      |
| 23301      | Tinned peaches, pears & pineapples                                               | 0.6    |
| 23601      | All other tinned or bottled fruit                                                | 0.52   |
| 24001      | Dried fruit                                                                      | 3.71   |
| 24101      | Frozen strawberries, apple slices, peach halves, oranges and other frozen fruits | 1      |
| 24801      | Pure fruit juices                                                                | 0.533  |
| 29601      | Pizzas - frozen and not frozen                                                   | 0.16   |
| 29602      | Takeaway pizza                                                                   | 0.16   |
| 31801      | Soups - canned or cartons                                                        | 0.3    |

|        |                                                                                             |      |
|--------|---------------------------------------------------------------------------------------------|------|
| 32001  | Soups - from takeaway                                                                       | 0.3  |
| 32201  | Meals on wheels - items not specified                                                       | 0.2  |
| 100103 | Vegetable or fruit based curry                                                              | 0.4  |
| 100104 | Dhal & Dhal dishes                                                                          | 0.4  |
| 100106 | Other Indian dishes                                                                         | 0.4  |
| 100108 | Indian buffet or shared meal or unspecified Indian meal                                     | 0.2  |
| 100201 | Chinese or Thai meat or fish based dishes excluding curry                                   | 0.2  |
| 100202 | Chop suey and fu vung dishes                                                                | 0.2  |
| 100203 | Chinese or Thai vegetable based main course dishes                                          | 0.4  |
| 100204 | Chinese or Thai curry                                                                       | 0.2  |
| 100206 | Other Chinese or Thai dishes                                                                | 0.2  |
| 100207 | Chinese or Thai buffet, shared meal or unspecified meal                                     | 0.2  |
| 100301 | All other ethnic meals                                                                      | 0.2  |
| 110601 | Meat and vegetable stews, casseroles or hotpots                                             | 0.2  |
| 110602 | Chicken or turkey stews, casseroles or hotpots                                              | 0.2  |
| 110603 | Meat lasagne, cannelloni, moussaka and other meat-based oven baked dishes                   | 0.2  |
| 130201 | Pizza - cheese & tomato, vegetable; incl. Pizza, type not specified                         | 0.4  |
| 130202 | Pizza - meat, fish or poultry                                                               | 0.16 |
| 150101 | Lettuce & cress                                                                             | 1    |
| 150102 | Other green vegetables e.g. spinach, cabbage, sprouts                                       | 1    |
| 150201 | Peppers - raw/cooked                                                                        | 1    |
| 150202 | Courgettes, marrow, aubergine, pumpkin, plantain, cucumbers                                 | 1    |
| 150203 | Peas & sweetcorn                                                                            | 1    |
| 150204 | Baked Beans and other beans (not green beans) & pulses                                      | 1    |
| 150205 | Tomato - fresh, raw                                                                         | 1    |
| 150206 | Tomato - cooked or processed                                                                | 1    |
| 150301 | Carrots                                                                                     | 1    |
| 150302 | Onions - raw or cooked incl. 'onions' type not specified                                    | 1    |
| 150303 | Onions - fried                                                                              | 1    |
| 150304 | Other root vegetables/ tubers e.g. turnip, parsnip, radish, beetroot                        | 1    |
| 150401 | Mushrooms - raw or cooked                                                                   | 1    |
| 150501 | Mixed vegetables and 'veg' type not specified.                                              | 1    |
| 150502 | Other vegetables, e.g. artichoke, asparagus                                                 | 1    |
| 150503 | Vegetables in batter or breadcrumbs and deep fried e.g. onion rings                         | 0.4  |
| 150504 | Onion and other vegetable bhais & pakora                                                    | 0.4  |
| 150601 | Veggie burger, bean burger, veggie sausage, nut roast                                       | 0.4  |
| 150602 | Vegetable lasagne, veg cannelloni, veg moussaka and other oven baked vegetable based dishes | 0.4  |
| 150603 | Stuffed vegetables (e.g. stuffed pepper) and vegetable based starter                        | 0.4  |
| 150604 | Vegetable based stews & casseroles and veg-based pies                                       | 0.4  |
| 160101 | Mixed salad, main course - without dressing                                                 | 1    |
| 160102 | Mixed salad, side dish, without dressing; incl. 'salad' type not specified                  | 1    |
| 160103 | Green salad - without dressing                                                              | 1    |
| 160201 | Vegetable/ fruit and nut salad - with dressing                                              | 0.4  |
| 160301 | Meat salad e.g. beef, lamb salads                                                           | 0.2  |
| 160302 | Chicken or turkey salad                                                                     | 0.2  |
| 160303 | Fish salad e.g. tuna, salmon salads                                                         | 0.2  |
| 160401 | Cheese salad including ploughmans                                                           | 0.2  |
| 160402 | Egg salad                                                                                   | 0.2  |
| 160501 | Other salads e.g. Greek, Florida, Russian                                                   | 0.2  |
| 160601 | Salad buffet or buffet meal where items not specified                                       | 0.2  |
| 170105 | Noodles with meat, vegetables etc.                                                          | 0.2  |
| 180102 | Vegetable-based soups                                                                       | 0.3  |
| 180104 | Soups, other; incl. SOUP NOT SPECIFIED                                                      | 0.3  |
| 200101 | All citrus fruit, fresh e.g. orange, grapefruit                                             | 1    |
| 200102 | Banana, fresh                                                                               | 1    |
| 200103 | Apples, fresh                                                                               | 1    |
| 200104 | Pears, fresh                                                                                | 1    |
| 200105 | Stone fruit, fresh e.g. apricot, plum, peach, cherry, avocado                               | 1    |
| 200106 | Grapes, fresh                                                                               | 1    |
| 200107 | Soft fruit/berries, fresh e.g. strawberries, blackberries                                   | 1    |

|        |                                                                   |       |
|--------|-------------------------------------------------------------------|-------|
| 200108 | Melon, fresh                                                      | 1     |
| 200109 | Pineapple, fresh                                                  | 1     |
| 200110 | Fresh fruit salad, without cream/ice cream                        | 1     |
| 200111 | Other fresh fruit (kiwi, passion) & 'fruit', type not specified   | 1     |
| 200112 | Free school fruit                                                 | 1     |
| 200201 | Dried fruit e.g. sultanas, raisins                                | 3.71  |
| 200301 | Tinned, stewed/baked or processed fruit - without cream/ice cream | 1     |
| 230207 | Vegetarian based sandwich on white bread or roll                  | 0.4   |
| 230208 | Vegetarian based sandwich on brown bread or roll                  | 0.4   |
| 230209 | Vegetarian based sandwich bread not specified                     | 0.4   |
| 240102 | Meat-based sauce e.g. Bolognese, chilli con carne                 | 0.2   |
| 240104 | Tomato-based sauce containing vegetables, incl. ratatouille       | 0.4   |
| 240203 | Coleslaw                                                          | 0.4   |
| 240301 | Fruit filling e.g. peaches for pancakes                           | 1     |
| 240302 | Vegetable filling                                                 | 0.4   |
| 240701 | Unspecified meal e.g. 'meal', 'school meal' or 'meal at work'     | 0.2   |
| 260204 | PURE fruit juices                                                 | 0.533 |
| 260205 | Vegetable juices e.g. tomato juice, carrot juice                  | 0.533 |
| 290205 | Fruit and other pies/pastries                                     | 0.5   |

## 2. Fish – White and Oily Fish

White Fish (to calculate per week)

| Defra Code | Description                                                                                 | Factor |
|------------|---------------------------------------------------------------------------------------------|--------|
| 10201      | White fish, fresh or chilled                                                                | 6.58   |
| 10202      | White fish, frozen                                                                          | 6.58   |
| 11401      | White fish, dried or salted or smoked                                                       | 6.762  |
| 11702      | Shellfish, fresh or chilled                                                                 | 7      |
| 11703      | Shellfish, frozen                                                                           | 7      |
| 11801      | Takeaway fish                                                                               | 3.85   |
| 12001      | Other tinned or bottled fish                                                                | 5.67   |
| 12103      | Ready meals & other fish products - frozen or not frozen                                    | 2.45   |
| 12304      | Takeaway fish products                                                                      | 3.5    |
| 12305      | Takeaway fish based meals                                                                   | 3.5    |
| 100101     | Meat or fish based curry with sauce                                                         | 1.75   |
| 100102     | Meat or fish based curry without sauce                                                      | 1.75   |
| 100201     | Chinese or Thai meat or fish based dishes excluding curry                                   | 1.75   |
| 120101     | White fish - grilled, steamed, baked or boiled - no sauce                                   | 7      |
| 120102     | White fish - fried (incl. in batter/breadcrumbs) - no sauce                                 | 3.85   |
| 120301     | Shellfish - without sauce / dressing e.g. prawns, shrimps, oysters, crab                    | 7      |
| 120501     | Other fish products and unspecified 'fish' e.g. squid, sushi, crabsticks                    | 7      |
| 120601     | Fish, processed, in breadcrumbs (fish fingers, fish cakes, scampi) - without sauce/dressing | 3.5    |
| 120602     | Fish burgers (in bun)                                                                       | 1.575  |
| 120603     | Fish based pie or other dish e.g. paella, kedgeree, tuna pasta bake                         | 2.45   |
| 130202     | Pizza - meat, fish or poultry                                                               | 0.175  |
| 160303     | Fish salad e.g. tuna, salmon salads                                                         | 0.7    |
| 230110     | Fish based sandwich on white bread or roll                                                  | 2.31   |
| 230111     | Fish based sandwich on brown bread or roll                                                  | 2.31   |
| 230112     | Fish based sandwich bread not specified                                                     | 2.31   |
| 240103     | Fish or seafood based sauce                                                                 | 3.43   |
| 240304     | Fish-based filling e.g. tuna mayonnaise                                                     | 4.55   |

Oily Fish (to calculate per week)

| Defra Code | Description                                                              | Factor |
|------------|--------------------------------------------------------------------------|--------|
| 10601      | Herrings & other blue fish, fresh or chilled                             | 6.195  |
| 10602      | Herrings & other blue fish, frozen                                       | 6.195  |
| 10701      | Salmon, fresh or chilled                                                 | 6.58   |
| 10702      | Salmon, frozen                                                           | 6.58   |
| 10801      | Blue fish, dried or salted or smoked                                     | 4.956  |
| 11901      | Tinned salmon                                                            | 7      |
| 12001      | Other tinned or bottled fish                                             | 1.33   |
| 12103      | Ready meals & other fish products - frozen or not frozen                 | 1.05   |
| 120201     | Trout, tuna and salmon only - fresh - without sauce/dressing             | 7      |
| 120202     | Other fatty fish without sauce/dressing e.g. herring, mackerel, sardines | 7      |
| 120401     | Kippers and other smoked fish e.g. smoked salmon                         | 7      |
| 120603     | Fish based pie or other dish e.g. paella, kedgeree, tuna pasta bake      | 1.05   |
| 160303     | Fish salad e.g. tuna, salmon salads                                      | 0.7    |

### 3. Red and Processed Meat

#### Processed Red Meat

| Defra Code | Description                                                                          | Factor   |
|------------|--------------------------------------------------------------------------------------|----------|
| 5502       | Bacon and ham joints, uncooked                                                       | 0.69104  |
| 5505       | Bacon and ham rashers, uncooked                                                      | 0.65825  |
| 5801       | Cooked ham & bacon                                                                   | 1        |
| 6201       | Corned beef/ corned meat (canned or sliced)                                          | 1        |
| 6601       | Other cooked meat                                                                    | 0.954007 |
| 7102       | Other canned meat and canned meat products                                           | 0.532811 |
| 7901       | Sausages (uncooked) - pork                                                           | 0.78     |
| 8001       | Sausages (uncooked) - beef                                                           | 0.779    |
| 8302       | Meat pies                                                                            | 0.271562 |
| 8303       | Sausage rolls                                                                        | 0.28     |
| 8401       | Meat pies, pasties and puddings                                                      | 0.27445  |
| 8501       | Burgers                                                                              | 0.73     |
| 8902       | Other convenience meat products                                                      | 0.240481 |
| 9301       | Pâté                                                                                 | 1        |
| 9302       | Delicatessen type sausages: cooked or cured                                          | 1        |
| 9403       | Meat pastes and spreads                                                              | 1        |
| 9501       | Takeaway meat pies & pasties                                                         | 0.266316 |
| 9502       | Burger & bun e.g. hamburger                                                          | 0.485    |
| 9503       | Kebabs                                                                               | 0.5      |
| 9504       | Sausages & saveloys                                                                  | 1        |
| 9506       | Miscellaneous meats                                                                  | 0.649653 |
| 110106     | Bacon                                                                                | 1        |
| 110107     | Gammon or ham                                                                        | 1        |
| 110301     | Small or single burgers                                                              | 0.39     |
| 110302     | Large or double burgers                                                              | 0.58     |
| 110401     | Kebabs - all types including chicken                                                 | 0.5      |
| 110402     | Plain sausages e.g. beef, pork                                                       | 1        |
| 110403     | Other sausages                                                                       | 1        |
| 110404     | Hot dogs and sausage sandwiches                                                      | 0.1769   |
| 110501     | Meat pies (pastry topped) and pasties                                                | 0.16     |
| 110502     | Meat pies (potato topped e.g. shepherd's pie)                                        | 0.1963   |
| 110503     | Sausage roll (pastry)                                                                | 0.28     |
| 110701     | All pates                                                                            | 0.5      |
| 110801     | Other meat products or dishes                                                        | 0.2592   |
| 130202     | Pizza - meat, fish or poultry                                                        | 0.0337   |
| 160301     | Meat salad e.g. beef, lamb salads                                                    | 0.314    |
| 230101     | Meat based sandwich on white bread or roll                                           | 0.242    |
| 230102     | Meat based sandwich on brown bread or roll                                           | 0.242    |
| 230103     | Meat based sandwich bread not specified                                              | 0.242    |
| 230107     | Bacon and egg based sandwich on white bread or roll including Bacon and Egg McMuffin | 0.25     |
| 230108     | Bacon and egg based sandwich on brown bread or roll                                  | 0.25     |
| 230109     | Bacon and egg based sandwich bread not specified                                     | 0.25     |

#### Red and Processed Red Meat

| Defra Code | Description                                | Factor   |
|------------|--------------------------------------------|----------|
| 3102       | Beef: joints (including sides) on the bone | 0.561    |
| 3103       | Beef: joints (boned)                       | 0.632697 |
| 3104       | Beef steak (less expensive)                | 0.636751 |
| 3105       | Beef steak (more expensive)                | 0.728463 |
| 3106       | Beef, minced                               | 0.82     |
| 3107       | All other beef and veal                    | 0.62     |
| 3601       | Mutton                                     | 0.617767 |
| 3602       | Lamb joints                                | 0.589275 |

|        |                                                                           |          |
|--------|---------------------------------------------------------------------------|----------|
| 3603   | Lamb chops                                                                | 0.549128 |
| 3604   | All other lamb                                                            | 0.714897 |
| 4101   | Pork joints                                                               | 0.570298 |
| 4102   | Pork chops – uncooked                                                     | 0.588    |
| 4103   | Pork fillets and steak                                                    | 0.65     |
| 4104   | All other pork – uncooked                                                 | 0.625934 |
| 4603   | Ox liver                                                                  | 0.91     |
| 4604   | Lambs liver                                                               | 0.78     |
| 4605   | Pigs liver                                                                | 0.88     |
| 4607   | All other liver                                                           | 0.884907 |
| 5101   | All offals other than liver                                               | 0.56119  |
| 5502   | Bacon and ham joints, uncooked                                            | 0.69104  |
| 5505   | Bacon and ham rashers, uncooked                                           | 0.65825  |
| 5801   | Cooked ham & bacon                                                        | 1        |
| 6201   | Corned beef/ corned meat (canned or sliced)                               | 1        |
| 6601   | Other cooked meat                                                         | 0.954007 |
| 7102   | Other canned meat and canned meat products                                | 0.532811 |
| 7801   | Other meat (rabbit, venison, etc) – uncooked                              | 0.594    |
| 7901   | Sausages (uncooked) - pork                                                | 0.78     |
| 8001   | Sausages (uncooked) - beef                                                | 0.779    |
| 8302   | Meat pies                                                                 | 0.271562 |
| 8303   | Sausage rolls                                                             | 0.28     |
| 8401   | Meat pies, pasties and puddings                                           | 0.27445  |
| 8501   | Burgers                                                                   | 0.73     |
| 8901   | COMPLETE meat-based ready meals                                           | 0.144783 |
| 8902   | Other convenience meat products                                           | 0.240481 |
| 9301   | Pâté                                                                      | 1        |
| 9302   | Delicatessen type sausages: cooked or cured                               | 1        |
| 9403   | Meat pastes and spreads                                                   | 1        |
| 9501   | Takeaway meat pies & pasties                                              | 0.266316 |
| 9502   | Burger & bun e.g. hamburger                                               | 0.485    |
| 9503   | Kebabs                                                                    | 0.5      |
| 9504   | Sausages & savelovs                                                       | 1        |
| 9505   | MEAT- based meals incl. Indian & Chinese takeaways                        | 0.208303 |
| 9506   | Miscellaneous meats                                                       | 0.649653 |
| 100101 | Meat or fish based curry with sauce                                       | 0.0928   |
| 100102 | Meat or fish based curry without sauce                                    | 0.5      |
| 100201 | Chinese or Thai meat or fish based dishes excluding curry                 | 0.17     |
| 100202 | Chop Suey and Fu Yung dishes                                              | 0.09     |
| 110101 | Steak - without sauce e.g. braised, sirloin                               | 1        |
| 110102 | Roast meat with sauce or gravv                                            | 0.64     |
| 110103 | Pork chops with sauce or gravv                                            | 0.81     |
| 110104 | Lamb chops with sauce or gravv                                            | 0.67     |
| 110105 | Spare ribs                                                                | 1        |
| 110106 | Bacon                                                                     | 1        |
| 110107 | Gammon or ham                                                             | 1        |
| 110108 | All offal including liver, kidney, tongue                                 | 1        |
| 110204 | Game with sauce or gravv                                                  | 0.71     |
| 110301 | Small or single burgers                                                   | 0.39     |
| 110302 | Large or double burgers                                                   | 0.58     |
| 110401 | Kebabs - all types including chicken                                      | 0.5      |
| 110402 | Plain sausages e.g. beef, pork                                            | 1        |
| 110403 | Other sausages                                                            | 1        |
| 110404 | Hot dogs and sausage sandwiches                                           | 0.1769   |
| 110501 | Meat pies (pastry topped) and pasties                                     | 0.16     |
| 110502 | Meat pies (potato topped e.g. shepherd's pie)                             | 0.1963   |
| 110503 | Sausage roll (pastry)                                                     | 0.28     |
| 110601 | Meat and vegetable stews, casseroles or hotpots                           | 0.0529   |
| 110603 | Meat lasagne, cannelloni, Moussaka and other meat-based oven baked dishes | 0.2041   |
| 110701 | All pates                                                                 | 0.5      |
| 110801 | Other meat products or dishes                                             | 0.2592   |
| 130202 | Pizza - meat, fish or poultry                                             | 0.0337   |

|        |                                                                                      |        |
|--------|--------------------------------------------------------------------------------------|--------|
| 160301 | Meat salad e.g. beef, lamb salads                                                    | 0.314  |
| 170105 | Noodles with meat, vegetables etc.                                                   | 0.2    |
| 230101 | Meat based sandwich on white bread or roll                                           | 0.242  |
| 230102 | Meat based sandwich on brown bread or roll                                           | 0.242  |
| 230103 | Meat based sandwich bread not specified                                              | 0.242  |
| 230107 | Bacon and egg based sandwich on white bread or roll including Bacon and Egg McMuffin | 0.25   |
| 230108 | Bacon and egg based sandwich on brown bread or roll                                  | 0.25   |
| 230109 | Bacon and egg based sandwich bread not specified                                     | 0.25   |
| 240102 | Meat-based sauce e.g. Bolognese, chilli con carne                                    | 0.3366 |





TABLE S3: LIST OF VARIABLES IN THE FINAL DATASET

| Variable                   | Description                                                                                                                                                                           |
|----------------------------|---------------------------------------------------------------------------------------------------------------------------------------------------------------------------------------|
| Case number                | Household case number                                                                                                                                                                 |
| URN                        | Unique reference number given when 2012, 2013 and 2014 datasets were combined                                                                                                         |
| Survey Year                | Year of survey – 2012 or 2013 or 2014                                                                                                                                                 |
| MEMHH                      | Number of people in the household                                                                                                                                                     |
| Sum of Quantity            | The total quantity (weight in g ) of all food and drink purchased during the data collection period, at the household level.                                                          |
| Sum of GHG                 | The total quantity of greenhouse gas emissions (Kg CO <sub>2</sub> e)for the food and drink purchased, at the household level. Calculated as per the method described.                |
| Sum of LU                  | The total quantity of land use (ha) for the food and drink purchased, at the household level. Calculated as per the method described.                                                 |
| Total expenditure          | The total expenditure (£) on food and drink purchased, at the household level.                                                                                                        |
| Quantity per HH member     | The quantity (weight in g) of food and drink per household member, calculated by dividing the total quantity by the numbers of people in the household.                               |
| GHG per HH member          | The total quantity of GHG emissions (Kg CO <sub>2</sub> e) per household member, calculated by dividing the total quantity by the numbers of people in the household.                 |
| LU per HH member           | The total quantity of land use (ha) per household member, calculated by dividing the total quantity by the numbers of people in the household.                                        |
| Expenditure per HH member  | The expenditure (£) on food and drink purchased per household member, calculated by dividing the total expenditure by the numbers of people in the household.                         |
| DQI total score            | The Diet Quality Index calculated as per the method described.                                                                                                                        |
| DQI % score                | The DQI adjusted to a 0-100 percentage score                                                                                                                                          |
| Household min KCAL for BMR | The minimum number of Kcal that would be required to sustain basal metabolic rate for all household members, taking into account sex and age. Calculated as per the method described. |
